# Supplementary material for: Conjugated polyelectrolyte nano field emission adlayers
Source: Royal Society of Chemistry journal article supplement (doi:10.1039/c6nh00071a), 2016-01-01
Supplement: c6nh00071a1.pdf [file c6nh00071a1.pdf]

Supplementary Material

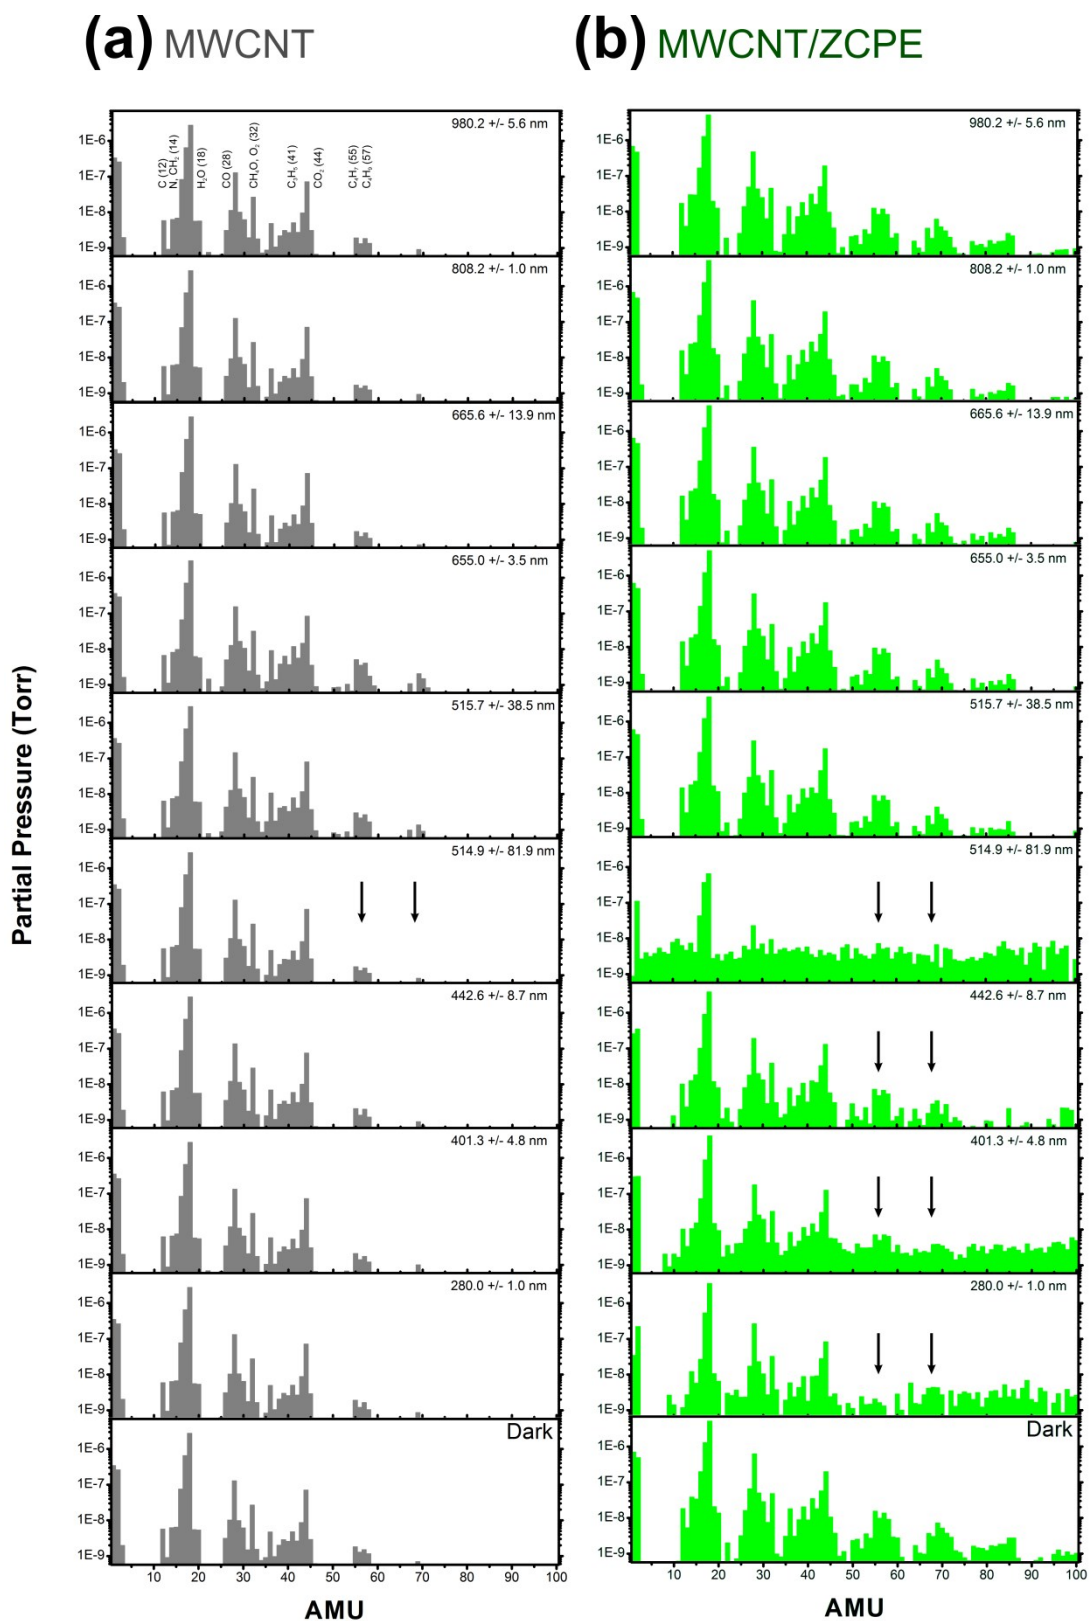

**Figure S1:** *In situ* residual gas analysis of the chamber ambient during electron emission, as a function of optical excitation for (a) MWCNT and (b) MWCNT/ZCPE.
